# Supplementary material for: Sociodemographic and Medical Determinants of Quality of Life in Long-Term Childhood Acute Lymphoblastic Leukemia Survivors Enrolled in EORTC CLG Studies
Source: MDPI journal article supplement (doi:10.3390/cancers14010152), 2021-12-29
Supplement: s1 [file s1]

**Figure S1: Treatment protocols in detail**  
**EORTC study 58741**

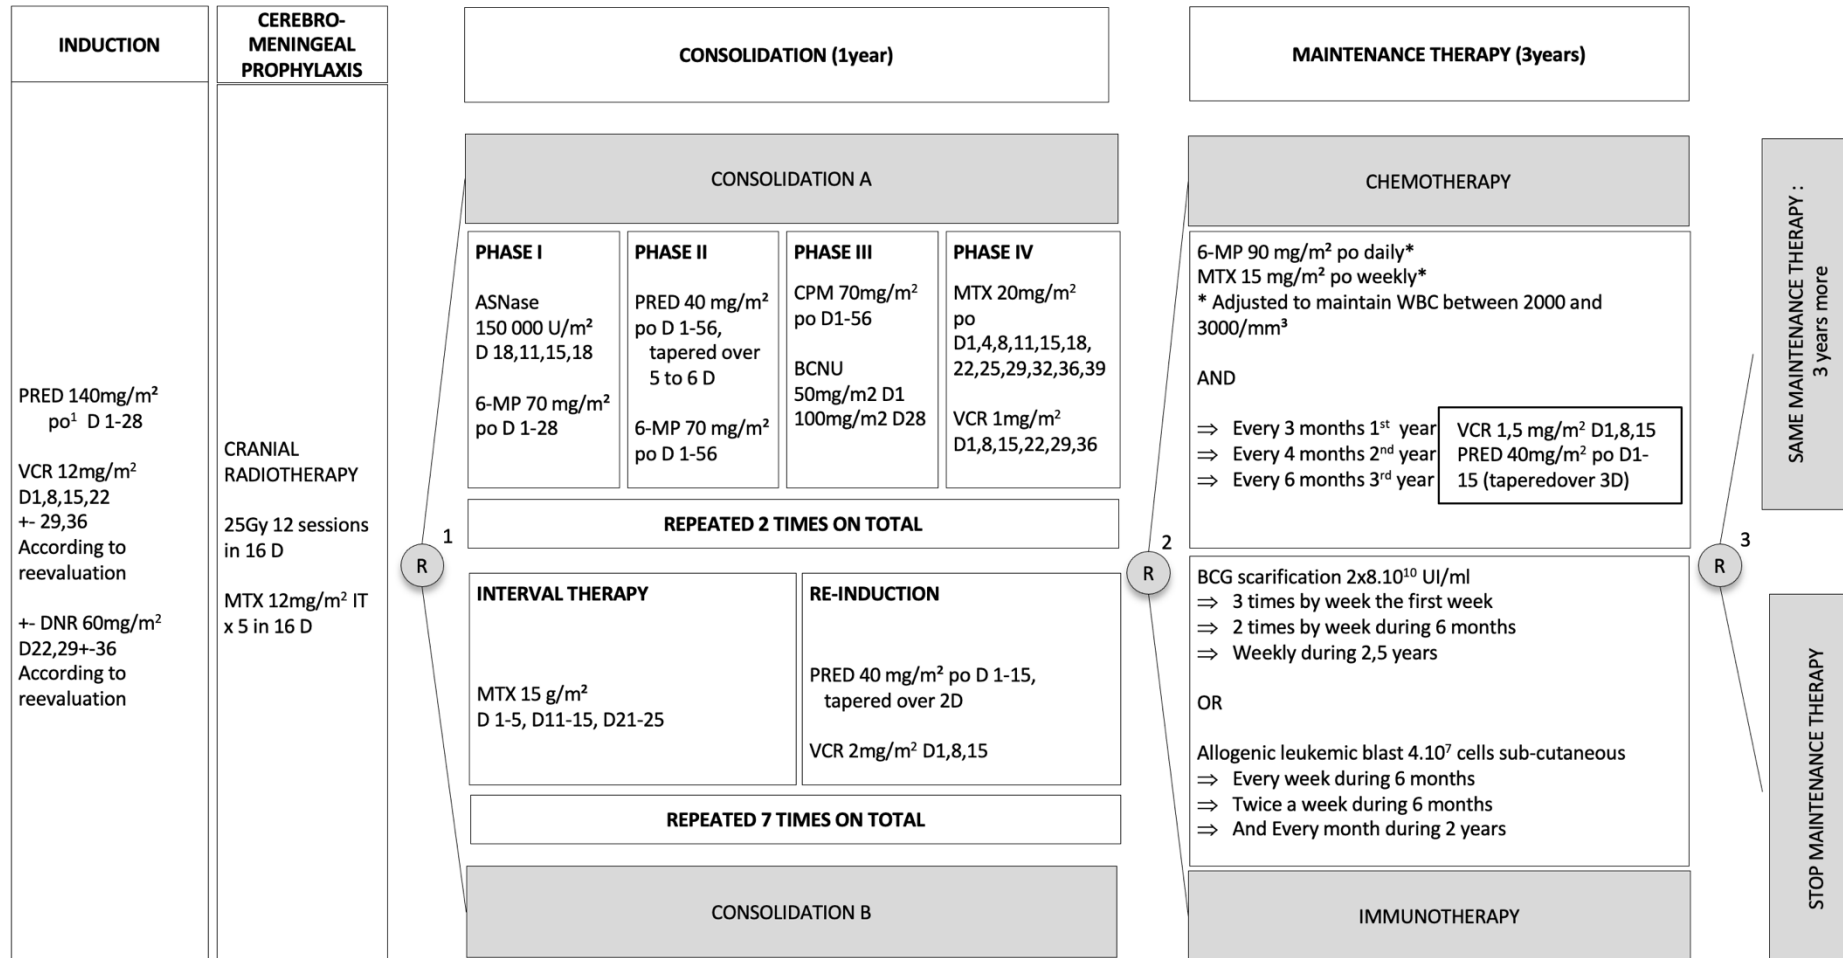

**Notes:**

<sup>1</sup> per oral (when not specified, administration is intravenous)

**Abbreviations:** ASNase: asparaginase, BCNU : Carmustine, CPM: cyclophosphamide, DNR: daunorubicin, 6-MP: 6-mercaptopurine, MTX: methotrexate, PRED: prednisone, R: randomization, VCR: vincristine

**EORTC study 58831:** standard risk patients (RF<1.2) in CR at the end of induction

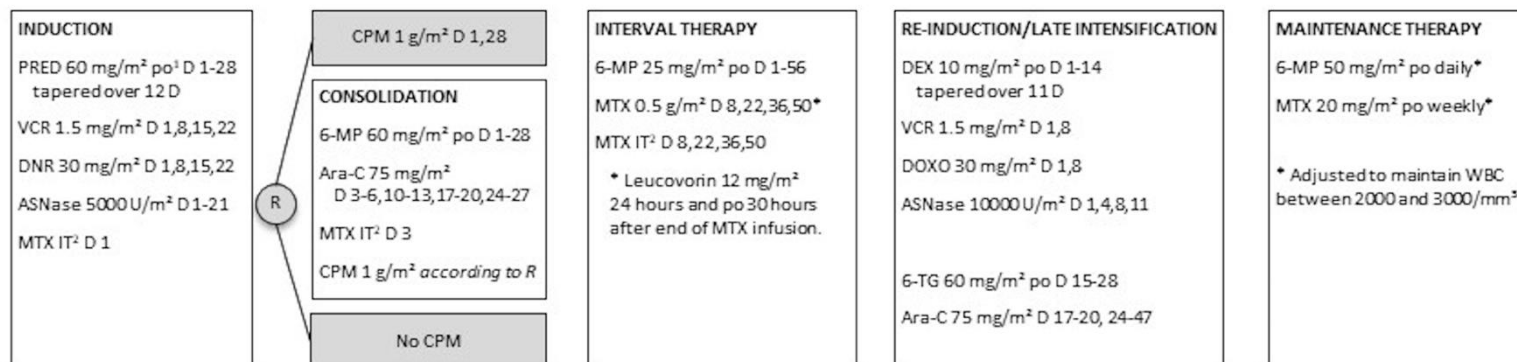

**EORTC study 58832:** medium risk patients (RF 1.2-1.69), high risk patients (RF≥1.7), and standard risk patients (RF<1.2) not in CR at the end of induction

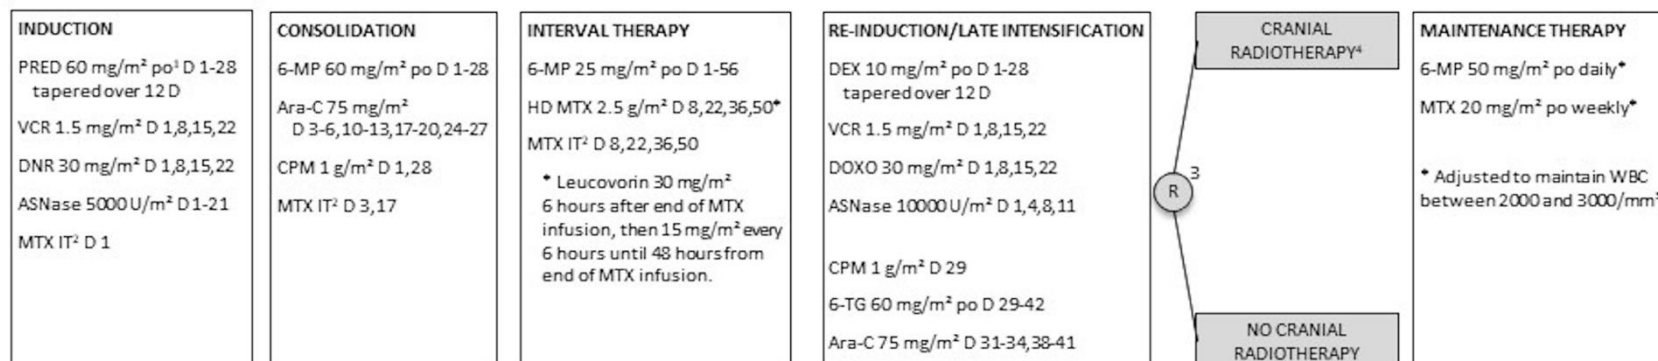

**Notes:**

<sup>1</sup> Per oral (when not specified, administration is intravenous)

<sup>2</sup> Intrathecal at the dose of 6 mg < 1 year, 8 mg 1-2 year, 10 mg 2-3 year, 12 mg ≥ 3 year

<sup>3</sup> Patients in complete remission at the end of consolidation and still in complete remission after the end of late intensification

<sup>4</sup> Dose according to age : 16 Gy (if age < 1 year), 20 Gy (if age 1-2 years) or 24 Gy (if age ≥ 2 years)

**Abbreviations:** Ara-C: cytarabine, ASNase: asparaginase, CPM: cyclophosphamide, CR: complete remission, D: day, DEX: dexamethasone, DNR: daunorubicin, DOXO: doxorubicin, HD: high-dose, IT: intrathecal, 6-MP: 6-mercaptopurine, MTX: methotrexate, PRED: prednisone, R: randomization, 6-TG: 6-thioguanine, VCR: vincristine, WBC: white blood cells



**Table S1:** Summary of predictors of interest, QoL outcome subscales and covariates used for the adjusted models.

| Predictors of QoL of interest                 | QoL outcome                                                                                                                                                                       | Covariates for adjusted model              |
|-----------------------------------------------|-----------------------------------------------------------------------------------------------------------------------------------------------------------------------------------|--------------------------------------------|
| Gender                                        | <ul style="list-style-type: none"> <li>SF-12: Mental and Physical component summary</li> <li>IOC-CS: Life challenges, Personal growth, Socializing and Body and health</li> </ul> | Protocol, Age at follow-up                 |
| Age at diagnosis                              | <ul style="list-style-type: none"> <li>SF-12: Mental component summary</li> <li>IOC-CS: Life challenges, Personal growth, Socializing and Body and health</li> </ul>              | Protocol, Age at follow-up, Gender         |
| Relapse/SN                                    | <ul style="list-style-type: none"> <li>SF-12: Mental and Physical component summary</li> <li>IOC-CS: Life challenges, Personal growth, Socializing and Body and health</li> </ul> | Protocol, Age at follow-up, Gender         |
| NCI risk group                                | <ul style="list-style-type: none"> <li>SF-12: Mental and Physical component summary</li> </ul>                                                                                    | Protocol, Age at follow-up, Gender         |
| CRT and its interaction with age at diagnosis | <ul style="list-style-type: none"> <li>SF-12: Physical component summary</li> <li>IOC-CS : Thinking/memory problems</li> </ul>                                                    | Age at diagnosis, Age at follow-up, Gender |

Abbreviations: CRT: Cranial Radiotherapy, IOC-CS: Impact of Cancer-Childhood Survivors, NCI: National Cancer Institute, QoL: quality of life, SF-12: Short-Form Health Survey, SN: second neoplasm

**Table S2:** Descriptive summary of the SF-12 and IOC-CS scales used

|                                  | <b>Total<br/>(N=186)</b> |
|----------------------------------|--------------------------|
| <b><i>SF-12</i></b>              |                          |
| Mental component summary         |                          |
| Median                           | 49.5                     |
| Range                            | 18.4 - 62.5              |
| Mean (SD)                        | 47.25 (9.97)             |
| N                                | 171                      |
| Physical component summary       |                          |
| Median                           | 57.1                     |
| Range                            | 24.7 - 67.0              |
| Mean (SD)                        | 54.52 (7.87)             |
| N                                | 170                      |
| <b><i>IOC-CS</i></b>             |                          |
| Life challenges (-)              |                          |
| Median                           | 1.9                      |
| Range                            | 1.0 - 4.6                |
| Mean (SD)                        | 1.95 (0.70)              |
| N                                | 141                      |
| Personal growth (+)              |                          |
| Median                           | 3.1                      |
| Range                            | 1.0 - 5.0                |
| Mean (SD)                        | 3.02 (1.08)              |
| N                                | 138                      |
| Socializing (+)                  |                          |
| Median                           | 4.7                      |
| Range                            | 1.0 - 5.0                |
| Mean (SD)                        | 4.23 (0.80)              |
| N                                | 139                      |
| Thinking and memory problems (-) |                          |
| Median                           | 2.0                      |
| Range                            | 1.0 - 4.4                |
| Mean (SD)                        | 2.24 (0.83)              |
| N                                | 141                      |
| Body and health (+)              |                          |
| Median                           | 3.6                      |
| Range                            | 1.4 - 5.0                |
| Mean (SD)                        | 3.53 (0.75)              |
| N                                | 140                      |

Abbreviations: IOC-CS: Impact of Cancer-Childhood Survivors, SF-12: Short-Form Health Survey.

Note. (+) is indicated for positive impact scales of the IOC-CS, (-) is indicated for negative impact scales of the IOC-CS. For positive impact scales, a higher mean score indicates a larger positive impact, while for the negative impact scales, a higher mean score indicates a larger negative impact.

Table S3: Distribution of predictors of interest by covariates used for the adjusted models

|                                         | Age at diagnosis, years |           | Sex       |           | Relapse or Second cancer |           | NCI risk group |           | Cranial radiotherapy |           |
|-----------------------------------------|-------------------------|-----------|-----------|-----------|--------------------------|-----------|----------------|-----------|----------------------|-----------|
|                                         | <6                      | >=6       | Male      | Female    | No                       | Yes       | Standard Risk  | High Risk | No                   | Yes       |
|                                         | (N=115)                 | (N=71)    | (N=77)    | (N=109)   | (N=151)                  | (N=35)    | (N=131)        | (N=55)    | (N=157)              | (N=29)    |
|                                         | N (%)                   | N (%)     | N (%)     | N (%)     | N (%)                    | N (%)     | N (%)          | N (%)     | N (%)                | N (%)     |
| Male                                    | 45 (39.1)               | 32 (45.1) |           |           | 64 (42.4)                | 13 (37.1) | 55 (42.0)      | 22 (40.0) | 66 (42.0)            | 11 (37.5) |
| Female                                  | 70 (60.9)               | 39 (54.9) |           |           | 87 (57.6)                | 22 (62.9) | 76 (58.0)      | 33 (60.0) | 91 (58.0)            | 18 (62.5) |
| Age at diagnosis, years                 |                         |           |           |           |                          |           |                |           |                      |           |
| <6                                      |                         |           | 45 (58.4) | 70 (64.2) | 97 (64.2)                | 18 (51.4) | 91 (69.5)      | 24 (43.6) | 99 (63.1)            | 16 (55.2) |
| >=6                                     |                         |           | 32 (41.6) | 39 (35.8) | 54 (35.8)                | 17 (48.6) | 40 (30.5)      | 31 (56.4) | 58 (36.9)            | 13 (44.8) |
| Time to relapse or second cancer, years |                         |           |           |           |                          |           |                |           |                      |           |
| <18-24                                  | 72 (62.6)               | 13 (18.3) | 37 (48.1) | 48 (44.0) | 75 (49.7)                | 10 (28.6) | 67 (51.1)      | 18 (32.7) | 82 (52.2)            | 3 (10.3)  |
| >=25                                    | 43 (37.4)               | 58 (81.7) | 40 (51.9) | 61 (56.0) | 76 (50.3)                | 25 (71.4) | 64 (48.9)      | 37 (67.3) | 75 (47.8)            | 26 (89.7) |
| Time to death, years                    |                         |           |           |           |                          |           |                |           |                      |           |
| 58741                                   | 9 (7.8)                 | 8 (11.3)  | 7 (9.1)   | 10 (9.2)  | 12 (7.9)                 | 5 (14.3)  | 11 (8.4)       | 6 (10.9)  | 0 (0.0)              | 17 (58.6) |
| 58831                                   | 26 (22.6)               | 17 (23.9) | 15 (19.5) | 28 (25.7) | 30 (19.9)                | 13 (37.1) | 30 (22.9)      | 13 (23.6) | 35 (22.3)            | 8 (27.6)  |
| 58881                                   | 80 (69.6)               | 46 (64.8) | 55 (71.4) | 71 (65.1) | 109 (72.2)               | 17 (48.6) | 90 (68.7)      | 36 (65.5) | 122 (77.7)           | 4 (13.8)  |

**Table S4:** Univariate associations between gender and SF-12 subscales and IOC-CS subscales based on a univariate analysis

| <i>Parameter</i>   | <i>SF-12</i>                    |         |                                   |         | <i>IOC-CS</i>                   |             |                            |         |                  |
|--------------------|---------------------------------|---------|-----------------------------------|---------|---------------------------------|-------------|----------------------------|---------|------------------|
|                    | <i>Mental component summary</i> |         | <i>Physical component summary</i> |         | <i>Positive impact subscale</i> |             |                            |         |                  |
|                    |                                 |         |                                   |         | <i>Body and health (+)</i>      |             | <i>Personal growth (+)</i> |         |                  |
|                    | Estimate<br>(SE)                | P-value | Estimate<br>(SE)                  | P-value | Estimate<br>(SE)                | P-value     | Estimate<br>(SE)           | P-value | Estimate<br>(SE) |
| Intercept          | 48.34<br>(1.20)                 | <.001   | 55.73 (0.94)                      | <.0001  | 3.70 (0.10)                     | <.0001      | 2.92 (0.15)                | <.0001  | 4.22 (0.10)      |
| Gender (ref: Male) | -1.83 (1.55)                    | 0.24    | -2.04 (1.22)                      | 0.10    | -0.27 (0.13)                    | <b>0.04</b> | 0.16 (0.19)                | 0.40    | 0.02 (0.19)      |

Note. (+) is indicated for positive impact scales of the IOC-CS, (-) is indicated for negative impact scales of the IOC-CS. For positive impact scales, a higher mean score indicates a larger positive impact, while for the negative impact scales, a higher mean score indicates a larger negative impact.

**Table S5:** Univariate associations between age at diagnosis and the SF-12 mental subscale and IOC-CS subscales based on a univariate analysis

| <i>Parameter</i>            | <i>SF-12</i>                    |         | <i>IOC-CS</i>                   |         |                            |         |                        |         |
|-----------------------------|---------------------------------|---------|---------------------------------|---------|----------------------------|---------|------------------------|---------|
|                             | <i>Mental component summary</i> |         | <i>Positive impact subscale</i> |         |                            |         |                        |         |
|                             |                                 |         | <i>Body and health (+)</i>      |         | <i>Personal growth (+)</i> |         | <i>Socializing (+)</i> |         |
|                             | Estimate<br>(SE)                | P-value | Estimate<br>(SE)                | P-value | Estimate<br>(SE)           | P-value | Estimate<br>(SE)       | P-value |
| Intercept                   | 48.14 (1.25)                    | <.0001  | 3.58 (0.10)                     | <.0001  | 3.25 (0.14)                | <.0001  | 4.39 (0.11)            | <.0001  |
| Age at diagnosis (Ref: >=6) | -1.42 (1.58)                    | 0.37    | -0.08 (0.13)                    | 0.53    | -0.37 (0.19)               | 0.05    | -0.27 (0.14)           | 0.06    |

Note. (+) is indicated for positive impact scales of the IOC-CS, (-) is indicated for negative impact scales of the IOC-CS. For positive impact scales, a higher mean score indicates a larger positive impact, while for the negative impact scales, a higher mean score indicates a larger negative impact.

**Table S6:** Univariate associations between relapse/second cancer status and SF-12 subscales and IOC-CS subscales based on a univariate analysis

| <i>Parameter</i> | <i>SF-12</i>                    |         |                                   |         | <i>IOC-CS</i>                   |         |                            |         |                  |
|------------------|---------------------------------|---------|-----------------------------------|---------|---------------------------------|---------|----------------------------|---------|------------------|
|                  | <i>Mental component summary</i> |         | <i>Physical component summary</i> |         | <i>Positive impact subscale</i> |         |                            |         |                  |
|                  |                                 |         |                                   |         | <i>Body and health (+)</i>      |         | <i>Personal growth (+)</i> |         |                  |
|                  | Estimate<br>(SE)                | P-value | Estimate<br>(SE)                  | P-value | Estimate<br>(SE)                | P-value | Estimate<br>(SE)           | P-value | Estimate<br>(SE) |
| Intercept        | 47.78(0.84)                     | <.0001  | 55.36(0.65)                       | <.0001  | 3.62(0.07)                      | <.0001  | 2.92 (0.10)                | <.0001  | 4.32 (0.10)      |

|                                      |              |      |             |       |              |              |             |             |       |
|--------------------------------------|--------------|------|-------------|-------|--------------|--------------|-------------|-------------|-------|
| Relapse or second<br>cancer (Ref=No) | -2.91 (1.97) | 0.14 | -4.75(1.55) | 0.003 | -0.58 (0.17) | <b>0.001</b> | 0.67 (0.25) | <b>0.01</b> | -0.57 |
|--------------------------------------|--------------|------|-------------|-------|--------------|--------------|-------------|-------------|-------|

Note. (+) is indicated for positive impact scales of the IOC-CS, (-) is indicated for negative impact scales of the IOC-CS. For positive impact scales, a higher mean score indicates a larger positive impact, while for the negative impact scales, a higher mean score indicates a larger negative impact.



**Table S7:** Associations between NCI risk group versus mental component summary (MCS) and physical component summary (PCS) scores of the SF-12

| <i>Parameter</i>                  | <i>Mental component summary</i>  |                |                                  |                | <i>Physical component summary</i> |                |                                  |                  |
|-----------------------------------|----------------------------------|----------------|----------------------------------|----------------|-----------------------------------|----------------|----------------------------------|------------------|
|                                   | <i>Univariate</i>                |                | <i>Multivariable</i>             |                | <i>Univariate</i>                 |                | <i>Multivariable</i>             |                  |
|                                   | <i>Estimate</i><br>( <i>SE</i> ) | <i>P-value</i> | <i>Estimate</i><br>( <i>SE</i> ) | <i>P-value</i> | <i>Estimate</i><br>( <i>SE</i> )  | <i>P-value</i> | <i>Estimate</i><br>( <i>SE</i> ) | <i>P-value</i>   |
| Intercept                         | 46.73<br>(1.98)                  | <.0001         | 49.73<br>(2.51)                  | <.0001         | 58.75<br>(1.79)                   | <.0001         | 58.35 (1.40)                     | <.0001           |
| NCI risk group<br>(Ref= Standard) | 1.76<br>(1.68)                   | 0.29           | 1.37<br>(1.73)                   | 0.43           | -3.28<br>(1.32)                   | 0.01           | -3.04(1.22)                      | <b>0.01</b>      |
| Gender (ref: Male)                |                                  |                | -1.90<br>(1.57)                  | 0.23           |                                   |                | -1.75(1.10)                      | 0.12             |
| Age at follow-up<br>(Ref: >=25)   |                                  |                | -2.22<br>(2.0)                   | 0.27           |                                   |                | -0.86(1.41)                      | 0.54             |
| Protocol<br>(ref=58881)<br>58741  |                                  |                | 0.25<br>(2.97)                   | 0.93           |                                   |                | -11.91(2.09)                     | <b>&lt;.0001</b> |
| 58831/2                           |                                  |                | -1.19<br>(2.33)                  | 0.61           |                                   |                | -1.89(1.72)                      | 0.26             |

Note. (+) is indicated for positive impact scales of the IOC-CS, (-) is indicated for negative impact scales of the IOC-CS. For positive impact scales, a higher mean score indicates a larger positive impact, while for the negative impact scales, a higher mean score indicates a larger negative impact.

**Table S8:** Associations between CRT (interaction with age at diagnosis) versus PCS scores and TMP scores  
IOC-CS

| <i>Parameter</i>                | <i>SF-12-Physical component summary</i> |                  |                         |                | <i>IOC-CS-Thinking and memory problems (-)</i> |                |                         |                |
|---------------------------------|-----------------------------------------|------------------|-------------------------|----------------|------------------------------------------------|----------------|-------------------------|----------------|
|                                 | <i>Univariate</i>                       |                  | <i>Multivariable</i>    |                | <i>Univariate</i>                              |                | <i>Multivariable</i>    |                |
|                                 | <i>Estimate</i><br>(SE)                 | <i>P-value</i>   | <i>Estimate</i><br>(SE) | <i>P-value</i> | <i>Estimate</i><br>(SE)                        | <i>P-value</i> | <i>Estimate</i><br>(SE) | <i>P-value</i> |
| Intercept                       | 55.80<br>(0.61)                         | <.0001           | 56.7 (1.22)             | <.0001         | 2.18(0.07)                                     | <.0001         | 2.11(0.15))             | <.0001         |
| CRT(Ref=No)                     | -8.13(1.53)                             | <b>&lt;.0001</b> | -7.67(2.30)             | <b>0.001</b>   | 0.44 (0.20)                                    | <b>0.03</b>    | 0.32(0.29)              | 0.28           |
| Age at diagnosis<br>(Ref: >=6)  |                                         |                  | -0.87(2.83)             | 0.67           |                                                |                | 0.51(0.37)              | 0.17           |
| CRT* Age at<br>diagnosis        |                                         |                  | 0.001(3.17)             | 0.81           |                                                |                | 0.20(0.41)              | 0.63           |
| Gender (ref: Male)              |                                         |                  | -1.55(1.16)             | 0.13           |                                                |                | -0.06(0.15)             | 0.69           |
| Age at follow-up<br>(Ref: >=25) |                                         |                  | 1.05(1.35)              | 0.90           |                                                |                | -0.18(0.17)             | 0.30           |

Note. (+) is indicated for positive impact scales of the IOC-CS, (-) is indicated for negative impact scales of the IOC-CS. For positive impact scales, a higher mean score indicates a larger positive impact, while for the negative impact scales, a higher mean score indicates a larger negative impact.
